# Supplementary material for: Incidence of X and Y Chromosomal Aneuploidy in a Large Child Bearing Population
Source: PLoS One. 2016 Aug 11;11(8):e0161045. doi: 10.1371/journal.pone.0161045 (PMC4981345; doi:10.1371/journal.pone.0161045)
Supplement: S2 Table — (DOCX) [file pone.0161045.s005.docx]

**S2 Table: Demographics of Study Population.**

|  | **Maternal**  **(N=141,916)** | **Paternal (N=29,336)** |
| --- | --- | --- |
| Age, years  Mean  Median  Range | 33.4±5.8  34.6  12.6-63.2 | NC1 |
| Country of Origin2 (n, %)  United States  Ex-United States3 | 117,513 (82.8%)  24,363 (17.2%) | 16,856 (57.5%)  12,480 (42.5%) |
| Gestational Age (wks)  Mean  Median  Range | 13.6±5.5  12.1  5.7-40.9 | NA |
| Weight (pounds)4  Mean  Median  Range | 160.0±40  151.0  80.0-460.0 | NA |

1Information not collected.

2Top five most prevalent countries of origin

3No country reported for 418 maternal and 149 paternal samples.

4Weight reported only for the cases originating from within the United States to avoid including weights reported in Kg
